# Supplementary material for: The human small intestine contains two subsets of regulatory Foxp3+ CD4+ T cells with very different life span and functional properties
Source: bioRxiv or medRxiv preprint supplement (doi:10.1101/2020.02.12.941369), 2022-08-31
Supplement: Supplementary file [file media-1.pdf]

## Supplementary Materials

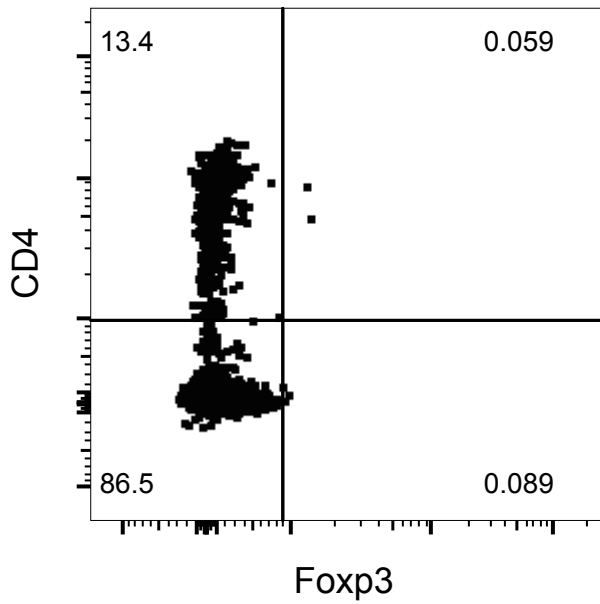

Supplementary Fig. S1: Very few Foxp3+CD4+ T cells are detected in the epithelium compartment of SI. Representative figure is shown (gated on CD3).

**a**

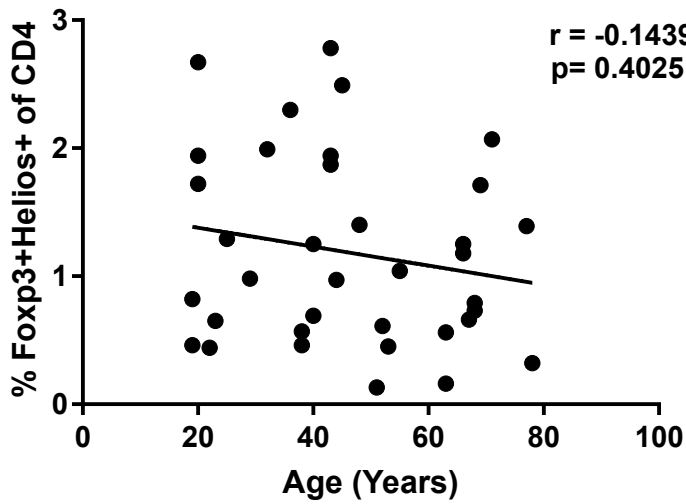

**b**

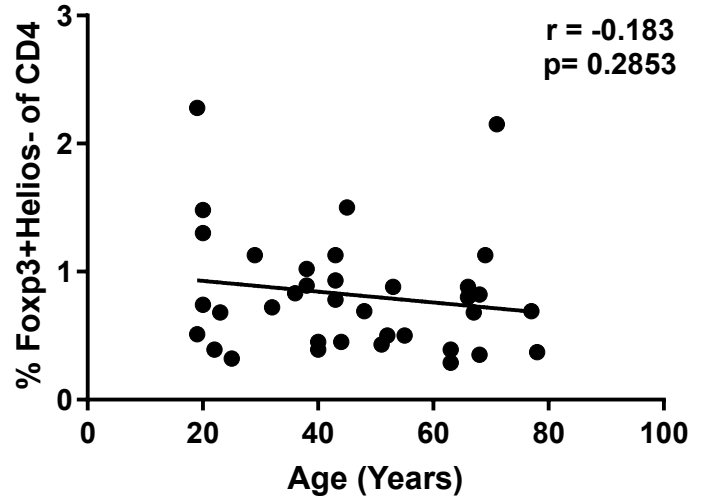

Supplementary Fig. S2: Percentage of Helios+Fxp3+ and Helios-Fxp3+ CD4 T cells in SI related to age. Lines represent nonlinear fitting;  $r$  and two-tailed  $p$ -values of age and subset representation are shown (Pearson correlation).
